# Supplementary material for: Sam37 is crucial for formation of the mitochondrial TOM–SAM supercomplex, thereby promoting β-barrel biogenesis
Source: PubMed Central journal article supplement — J Cell Biol. 2015 Sep 28;210(7):1047–54. doi: 10.1083/jcb.201504119 (PMC4586741; doi:10.1083/jcb.201504119), 2015-09-28
Supplement: supp_jcb.201504119_JCB_201504119_sm.pdf [file supp_jcb.201504119_JCB_201504119_sm.pdf]

Wenz et al., <http://www.jcb.org/cgi/content/full/jcb.201504119/DC1>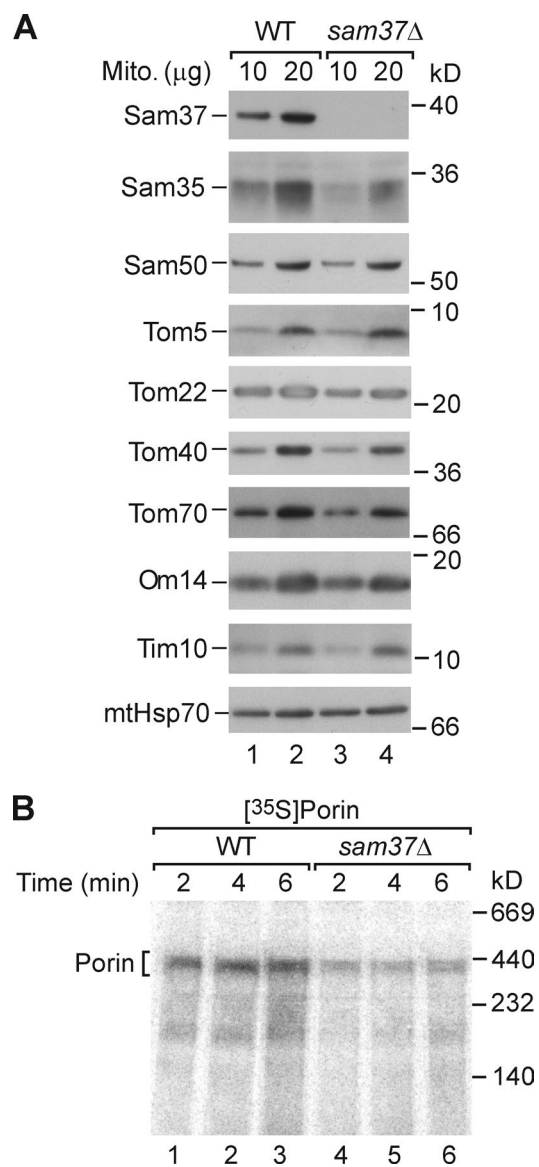

Figure S1. **Steady-state levels of mitochondrial proteins and Porin assembly in *sam37* $\Delta$  yeast grown at low temperature.** (A) Wild-type (WT) and *sam37* $\Delta$  yeast cells were grown at 19°C. Mitochondria were isolated (microgram, protein amount) and analyzed by SDS-PAGE and immunodetection with the indicated antisera. (B) <sup>35</sup>S-labeled Porin was imported into wild-type or *sam37* $\Delta$  mitochondria for the indicated periods. Mitochondria were solubilized in digitonin and analyzed by blue native electrophoresis and autoradiography.

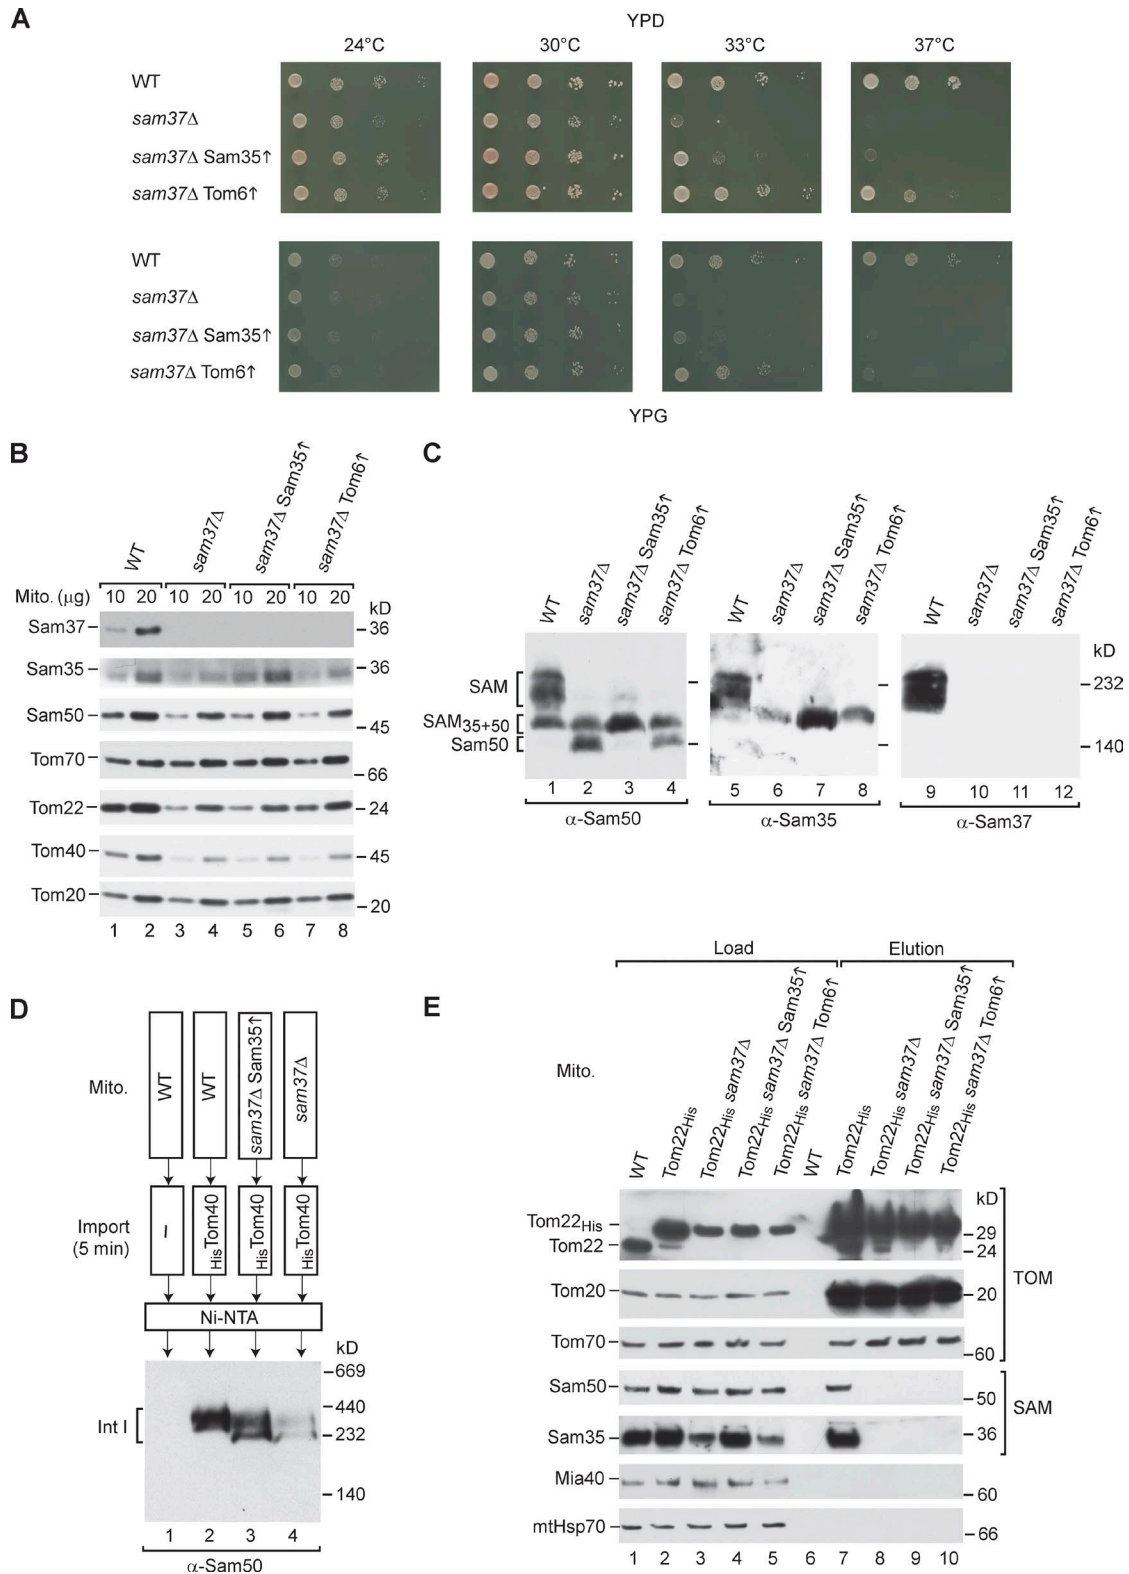

Figure S2. **Characterization of *sam37Δ* yeast strains overexpressing Sam35 or Tom6.** (A) Serial dilution of cells from wild-type (WT), *sam37Δ*, *sam37Δ* Sam35 $\uparrow$ , and *sam37Δ* Tom6 $\uparrow$  strains were plated on YPD and YPG media and incubated at the indicated temperatures. (B) Wild-type, *sam37Δ*, *sam37Δ* Sam35 $\uparrow$ , and *sam37Δ* Tom6 $\uparrow$  mitochondria (protein amount) were analyzed by SDS-PAGE and immunodetection with the indicated antisera (cells were grown at 19°C). (C) Wild-type, *sam37Δ*, *sam37Δ* Sam35 $\uparrow$ , and *sam37Δ* Tom6 $\uparrow$  mitochondria were lysed with digitonin and analyzed by blue native electrophoresis and immunodetection with the indicated antisera. SAM<sub>35+50</sub>, SAM subcomplex formed by Sam35 and Sam50. (D) Recombinant amounts of His Tom40 were imported into wild-type, *sam37Δ*, and *sam37Δ* Sam35 $\uparrow$  mitochondria where indicated. Mitochondria were lysed with digitonin and incubated with Ni-NTA agarose. Elution fractions were analyzed by blue native electrophoresis and immunodetection with antiserum directed against Sam50. (E) Wild-type, Tom22<sup>His</sup>, Tom22<sup>His</sup> *sam37Δ*, Tom22<sup>His</sup> *sam37Δ* Sam35 $\uparrow$ , and Tom22<sup>His</sup> *sam37Δ* Tom6 $\uparrow$  mitochondria were lysed and incubated with Ni-NTA agarose. Proteins in load and elution fractions were monitored by SDS-PAGE and immunodetection with the indicated antisera. Load, 3%; elution, 100%.

Table S1. *S. cerevisiae* strains used in this study

| Strain                                   | Genotype                                                                                                                                  | Number | Reference                 |
|------------------------------------------|-------------------------------------------------------------------------------------------------------------------------------------------|--------|---------------------------|
| YPH499 WT                                | <i>MATa ade2-101 his3-Δ200 leu2-Δ1 ura3-52 trp1-Δ63 lys2-801</i>                                                                          | 1,501  | Sikorski and Hieter, 1989 |
| <i>sam37Δ</i>                            | <i>MATa ade2-101 his3-Δ200 leu2-Δ1 ura3-52 trp1-Δ63 lys2-801 sam37::LEU2</i>                                                              | 1,271  | Ryan et al., 1999         |
| <i>Tom22<sub>His</sub></i>               | <i>MATa ade2-101 his3-Δ200 leu2-Δ1 ura3-52 trp1-Δ63 lys2-801 tom22::TOM22<sub>His</sub>-HIS3</i>                                          | 1,456  | Meisinger et al., 2001    |
| <i>tom22Δ Tom22↑</i>                     | <i>MATa ade2-101 his3-Δ200 leu2-Δ1 ura3-52 trp1-Δ63 lys2-801 tom22::HIS3 pYep352-MET25p-Tom22-CYC1↑ (2micron, URA3)</i>                   | 2,281  | Qiu et al., 2013          |
| <i>Tom22(N55C)<sub>His</sub></i>         | <i>MATa ade2-101 his3-Δ200 leu2-Δ1 ura3-52 trp1-Δ63 lys2-801 tom22::HIS3 pFL39-Tom22(C55)<sub>His</sub> (CEN, TRP1)</i>                   | 3,855  | Qiu et al., 2013          |
| <i>Tom22(K66C)<sub>His</sub></i>         | <i>MATa ade2-101 his3-Δ200 leu2-Δ1 ura3-52 trp1-Δ63 lys2-801 tom22::HIS3 pFL39-Tom22(K66C)<sub>His</sub> (CEN, TRP1)</i>                  | 4,177  | This study                |
| <i>Tom22(ΔIMS)<sub>His</sub></i>         | <i>MATa ade2-101 his3-Δ200 leu2-Δ1 ura3-52 trp1-Δ63 lys2-801 tom22::HIS3 pFL39-Tom22(ΔIMS)<sub>His</sub> (CEN, TRP1)</i>                  | 4,401  | This study                |
| <i>Tom22(ΔN)<sub>His</sub></i>           | <i>MATa ade2-101 his3-Δ200 leu2-Δ1 ura3-52 trp1-Δ63 lys2-801 tom22::HIS3 pFL39-Tom22(Δ4-54)<sub>His</sub> (CEN, TRP1)</i>                 | 4,400  | This study                |
| <i>Tom22<sub>His</sub> sam37Δ</i>        | <i>MATa ade2-101 his3-Δ200 leu2-Δ1 ura3-52 trp1-Δ63 lys2-801 sam37::LEU2 tom22::TOM22<sub>His</sub>-HIS3</i>                              | 4,237  | This study                |
| <i>sam37Δ Sam35↑</i>                     | <i>MATa ade2-101 his3-Δ200 leu2-Δ1 ura3-52 trp1-Δ63 lys2-801 sam37::LEU2 pRS426-Sam35 (2micron, URA3)</i>                                 | 4,759  | This study                |
| <i>sam37Δ Tom6↑</i>                      | <i>MATa ade2-101 his3-v200 leu2-Δ1 ura3-52 trp1-Δ63 lys2-801 sam37::LEU2 pRS426-Tom6 (2micron, URA3)</i>                                  | 4,760  | This study                |
| WT YPH499 pRS426                         | <i>MATa ade2-101 his3-Δ200 leu2-Δ1 ura3-52 trp1-Δ63 lys2-801 pRS426 (2micron, URA3)</i>                                                   | 4,761  | This study                |
| <i>Tom22<sub>His</sub> pRS426</i>        | <i>MATa ade2-101 his3-Δ200 leu2-Δ1 ura3-52 trp1-Δ63 lys2-801 tom22::TOM22<sub>His</sub>-HIS3 pRS426 (2micron, URA3)</i>                   | 4,762  | This study                |
| <i>Tom22<sub>His</sub> sam37Δ Sam35↑</i> | <i>MATa ade2-101 his3-Δ200 leu2-Δ1 ura3-52 trp1-Δ63 lys2-801 sam37::LEU2 tom22::TOM22<sub>His</sub>-HIS3 pRS426-Sam35 (2micron, URA3)</i> | 4,763  | This study                |
| <i>Tom22<sub>His</sub> sam37Δ Tom6↑</i>  | <i>MATa ade2-101 his3-Δ200 leu2-Δ1 ura3-52 trp1-Δ63 lys2-801 sam37::LEU2 tom22::TOM22<sub>His</sub>-HIS3 pRS426-Tom6 (2micron, URA3)</i>  | 4,764  | This study                |

WT, wild type.

Table S2. List of antibodies (rabbit antisera) used in this study

| Antibodies directed against                                                                       | Dilution                                             | Number     |
|---------------------------------------------------------------------------------------------------|------------------------------------------------------|------------|
| <i>S. cerevisiae</i> Atp4 (LQQSISEIQLSKLK)                                                        | 1:1,000 TBS + 5% milk                                | GR1970-5   |
| <i>S. cerevisiae</i> Cox4 (ARLELLGKLEGIDVFDTKP)                                                   | 1:1,000 TBS + 5% milk                                | GR 578-4   |
| <i>E. coli</i> GroEL (isolated full-length protein; antiserum detects <i>S. cerevisiae</i> Hsp60) | 1:1,000 TBS-T + 5% milk                              | 170 (60)   |
| <i>S. cerevisiae</i> Mia40 (purified full-length protein)                                         | 1:1,000 TBS + 5% milk                                | 315-7      |
| <i>S. cerevisiae</i> mtHsp70 (purified full-length protein)                                       | 1:2,000 TBS + 5% milk                                | 119-3 (39) |
| <i>S. cerevisiae</i> Om14 (LDGIISKYYSRYDKK)                                                       | 1:4,000 TBS + 5% milk                                | GR 3040-6  |
| <i>S. cerevisiae</i> Sam35 (KELVQFAQDTLKNFVQ)                                                     | 1:100 TBS (affinity purified antibodies)             | 551-7      |
| <i>S. cerevisiae</i> Sam37 (SNNLEQRDPQFRE)                                                        | 1:50 TBS (affinity purified antibodies)              | 161-8      |
| <i>S. cerevisiae</i> Sam50 (purified protein comprising AA 1–174)                                 | 1:50 TBS + 0.1% Tween (affinity purified antibodies) | 312-17     |
| <i>S. cerevisiae</i> Tim10 (GENMQKMGQSFNAAAGKF)                                                   | 1:250 TBS + 5% milk                                  | GR 2040-4  |
| <i>S. cerevisiae</i> Tom5 (MFGLPQQEVSSE)                                                          | 1:500 TBS + 5% milk                                  | GR 3419-10 |
| <i>S. cerevisiae</i> Tom7 (purified full-length protein)                                          | 1:250 TBS + 5% milk                                  | 230-10     |
| <i>S. cerevisiae</i> Tom20 (purified protein comprising AA 32–183)                                | 1:10,000 TBS + 5% milk                               | GR 3225-7  |
| <i>S. cerevisiae</i> Tom22 (purified protein comprising AA 1–97)                                  | 1:10,000 TBS + 5% milk                               | GR 3227-2  |
| <i>S. cerevisiae</i> Tom40 (purified full-length protein)                                         | 1:500 TBS + 5% milk                                  | 168-5      |
| <i>S. cerevisiae</i> Tom70 (purified protein comprising AA 247–390)                               | 1:500 TBS + 5% milk                                  | GR 657-3   |

## References

- Meisinger, C., M.T. Ryan, K. Hill, K. Model, J.H. Lim, A. Sickmann, H. Müller, H.E. Meyer, R. Wagner, and N. Pfanner. 2001. Protein import channel of the outer mitochondrial membrane: a highly stable Tom40-Tom22 core structure differentially interacts with preproteins, small tom proteins, and import receptors. *Mol. Cell. Biol.* 21:2337–2348. <http://dx.doi.org/10.1128/MCB.21.7.2337-2348.2001>
- Qiu, J., L.S. Wenz, R.M. Zerbes, S. Oeljeklaus, M. Bohnert, D.A. Stroud, C. Wirth, L. Ellenrieder, N. Thornton, S. Kutik, et al. 2013. Coupling of mitochondrial import and export translocases by receptor-mediated supercomplex formation. *Cell.* 154:596–608. <http://dx.doi.org/10.1016/j.cell.2013.06.033>
- Ryan, M.T., H. Müller, and N. Pfanner. 1999. Functional staging of ADP/ATP carrier translocation across the outer mitochondrial membrane. *J. Biol. Chem.* 274:20619–20627. <http://dx.doi.org/10.1074/jbc.274.29.20619>
- Sikorski, R.S., and P. Hieter. 1989. A system of shuttle vectors and yeast host strains designed for efficient manipulation of DNA in *Saccharomyces cerevisiae*. *Genetics.* 122:19–27.
